# Supplementary material for: PD-L1 expression on immune cells, but not on tumor cells, is a favorable prognostic factor for head and neck cancer patients
Source: PubMed Central journal article supplement (PMC5107906; doi:10.1038/srep36956), 2016-11-14

**PD-L1 expression on immune cells, but not on tumor cells, is a favorable prognostic factor for head and neck cancer patients**

Hye Ryun Kim<sup>1</sup>, Sang-Jun Ha<sup>2</sup>, Min Hee Hong<sup>1</sup>, Su Jin Heo<sup>1</sup>, Yoon Woo Koh<sup>3</sup>, Eun Chang Choi<sup>3</sup>, Eun Kyung Kim<sup>4</sup>, Kyoung Ho Pyo<sup>5</sup>, Inkyung Jung<sup>6</sup>, Daekwan Seo<sup>7</sup>, Jaewoo Choi<sup>7</sup>, Byoung Chul Cho<sup>1,5\*</sup> and Sun Och Yoon<sup>4\*</sup>

<sup>1</sup>Yonsei Cancer Center, Division of Medical Oncology, Yonsei University College of Medicine, Seoul, Korea; <sup>2</sup>Department of Biochemistry, College of Life Science & Biotechnology, Yonsei University, Seoul, Korea; <sup>3</sup>Department of Otorhinolaryngology, Yonsei University College of Medicine, Seoul, South Korea; <sup>4</sup>Department of Pathology, Yonsei University College of Medicine, Seoul, Korea; <sup>5</sup>JE-UK Institute for Cancer Research, JEUK Co., Ltd., Gumi-City, Kyungbuk, Korea; <sup>6</sup>Department of Biostatistics and Medical Informatics, Yonsei University College of Medicine, Seoul, Korea; <sup>7</sup>Severance Biomedical Science Institute, Yonsei University of College of Medicine, Seoul, Korea

## Supplementary Files

Supplementary Table (number 2)

Supplementary Figure (number 5)

**Supplementary Table 1** Multivariate Cox regression analysis for the prediction of RFS and OS

|                            | RFS             |       |               | OS              |       |               |
|----------------------------|-----------------|-------|---------------|-----------------|-------|---------------|
|                            | <i>P</i> -value | HR    | 95% CI        | <i>P</i> -value | HR    | 95% CI        |
| Age ( <58 vs. ≥58 years)   | 0.017           | 1.61  | 1.088 - 2.383 | 0.017           | 1.782 | 1.109 - 2.862 |
| Tumor stage                | <0.001          | 1.38  | 1.166 - 1.635 | <0.001          | 1.716 | 1.361 - 2.165 |
| Smoking                    | 0.034           | 1.265 | 1.018 - 1.572 | 0.264           | 1.157 | 0.896 - 1.495 |
| p16 positivity             | <0.001          | 0.416 | 0.269 - 0.644 | 0.007           | 0.497 | 0.3 - 0.824   |
| PD-L1 on tumor cells       | 0.208           | 1.346 | 0.848 - 2.137 | 0.319           | 1.325 | 0.762 - 2.306 |
| PD-L1 on immune cells      | 0.005           | 0.487 | 0.293 - 0.809 | 0.04            | 0.383 | 0.197 - 0.746 |
| PD-1 on TILs               | 0.024           | 0.564 | 0.343 - 0.926 | 0.07            | 0.574 | 0.316 - 1.045 |
| CD3 <sup>+</sup> T cells   | 0.005           | 0.573 | 0.387 - 0.849 | 0.017           | 0.561 | 0.35 - 0.901  |
| CD8 <sup>+</sup> T cells   | <0.001          | 0.469 | 0.314 - 0.701 | 0.003           | 0.484 | 0.299 - 0.784 |
| Foxp3 <sup>+</sup> T cells | 0.006           | 0.577 | 0.389 - 0.854 | 0.096           | 0.674 | 0.424 - 1.072 |
| LAG3 <sup>+</sup> T cells  | 0.055           | 0.685 | 0.466 - 1.008 | 0.163           | 0.72  | 0.454 - 1.142 |
| ICOS <sup>+</sup> T cells  | 0.531           | 0.885 | 0.603 - 1.298 | 0.646           | 1.113 | 0.705 - 1.759 |

Abbreviation: RFS, recurrence-free survival; OS, overall survival; HR, hazard ratio; CI, confidence interval

**Supplementary Table 2.** List of genes highly expressed in the IC3 group compared to the TC3 group

| Gene symbol  | P-value | Fold change in expression | Description                                                                        |
|--------------|---------|---------------------------|------------------------------------------------------------------------------------|
| CD8A         | 0.018   | 2.28                      | T <sub>eff</sub> signature genes                                                   |
| GZMA         | 0.059   | 1.90                      |                                                                                    |
| GZMB         | 0.152   | 1.21                      |                                                                                    |
| IFN $\gamma$ | 0.233   | 1.31                      |                                                                                    |
| EOMES        | 0.196   | 1.31                      |                                                                                    |
| PRF1         | 0.360   | 0.72                      |                                                                                    |
| CXCL9        | 0.323   | 1.10                      |                                                                                    |
| TBX21        | 0.115   | 1.40                      |                                                                                    |
| CD3E         | 0.007   | 3.28                      | Positive regulation of lymphocyte proliferation                                    |
| CD74         | 0.0005  | 2.40                      | Antigen processing and presentation of peptide antigens via MHC class II molecules |
| CTSS         | 0.001   | 3.16                      |                                                                                    |
| FCER1G       | 0.001   | 2.49                      |                                                                                    |
| HLA-DOA      | 0.001   | 2.55                      |                                                                                    |
| HLA-DQA1     | 0.009   | 4.49                      |                                                                                    |
| JAK3         | 0.011   | 3.11                      | B cell activation                                                                  |
| BANK1        | 0.009   | 3.45                      |                                                                                    |
| IGLL5        | 0.012   | 3.21                      |                                                                                    |
| PTPRC        | 0.012   | 3.13                      |                                                                                    |
| TNFRSF13C    | 0.016   | 3.62                      |                                                                                    |
| BCL2         | 0.119   | 3.42                      |                                                                                    |

Supplementary Figure 1.

Survival outcomes at each disease stage among the 402 head and neck squamous cell cancer patients.

(A) Recurrence-free survival of the patients according to disease stage. (B) Overall survival of the patients according to disease stage.

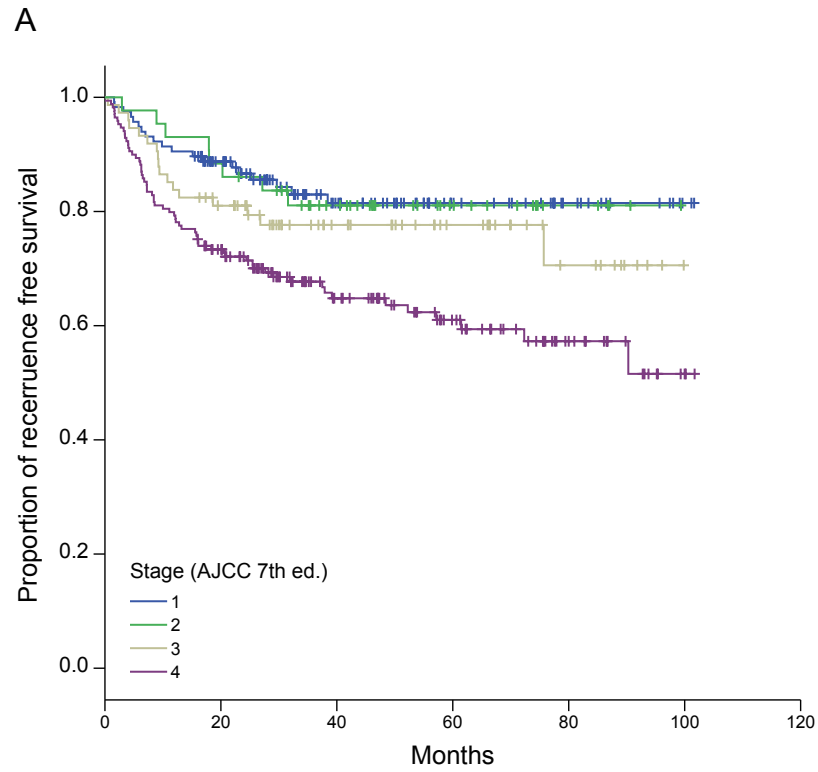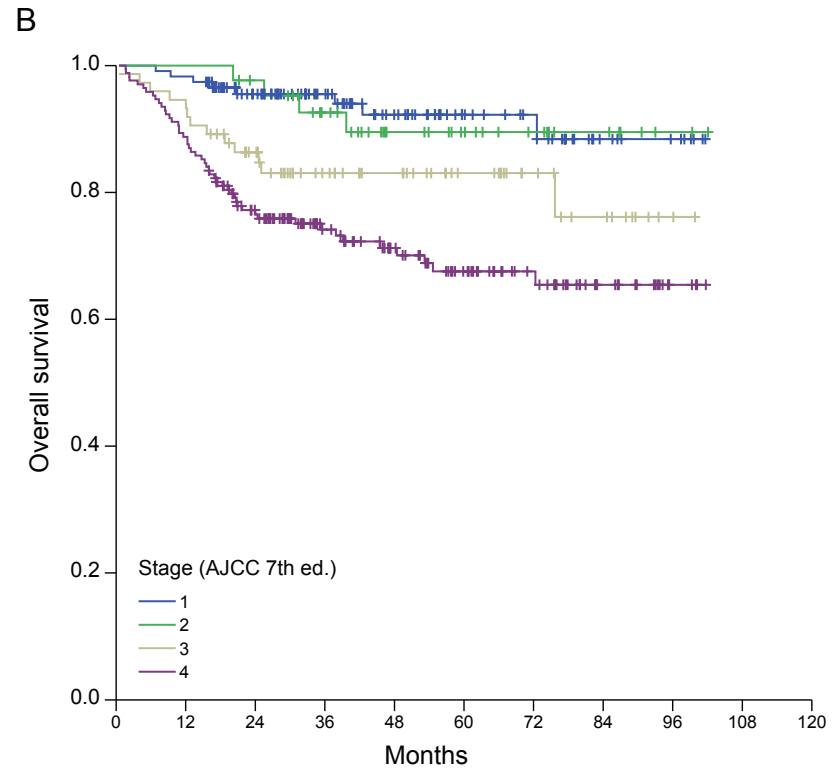

Supplementary Figure 2.

The frequency of (A) CD3+ tumor-infiltrating lymphocytes (TILs), (B) CD8+ TILs, (C) Foxp3+ TILs, (D) LAG3+ TILs, and (E) ICOS+ TILs. The X-axis represents the average number of cells in five representative high-power fields under 400 x magnifications, and the y-axis represents the frequency of the corresponding cell type.

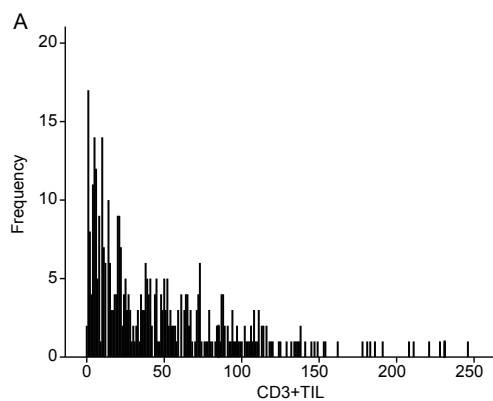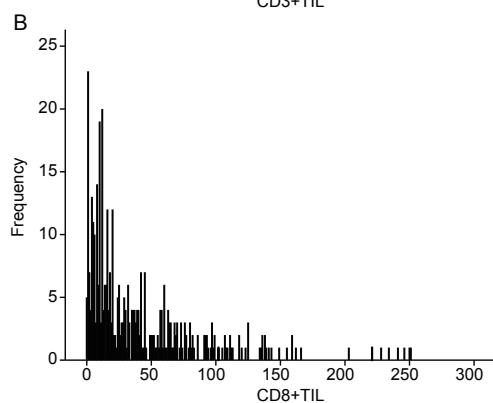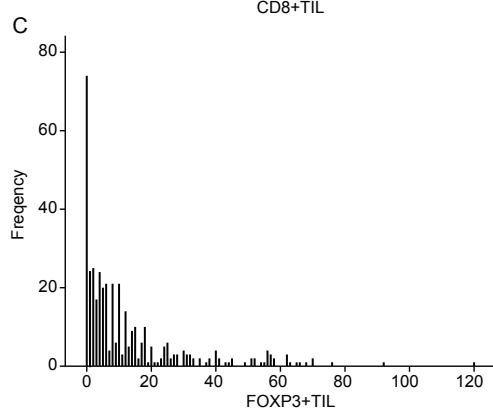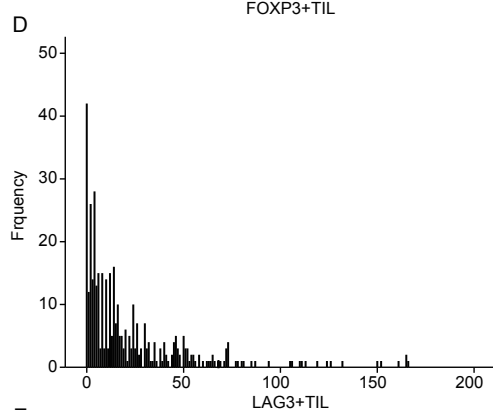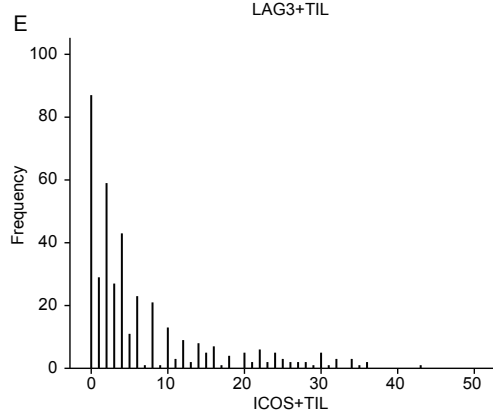

Supplementary Figure 3.

The distribution of PD-L1+ tumor cells (TC) was generally very focal (black arrow; A). Tumor-infiltrating T lymphocytes variably expressed PD-L1, and PD-L1-positive T cells were scattered within tumor cell nests (dotted arrow; A) or were aggregated along the periphery of tumor cell nests (dotted arrow; B). At high magnification, PD-L1 was found to be expressed by TC in intracytoplasmic and membranous patterns (C; black arrow) and by T cells in a perinuclear, dot-like, granular pattern (D; dotted arrow). A portion of tumor-infiltrating macrophages also variably expressed PD-L1 in intracytoplasmic and membranous patterns (E; empty arrow). The outlines of tumor nests are highlighted by dotted lines. Figures were captured at 200X magnification (A-B) or 400X magnification (C-E).

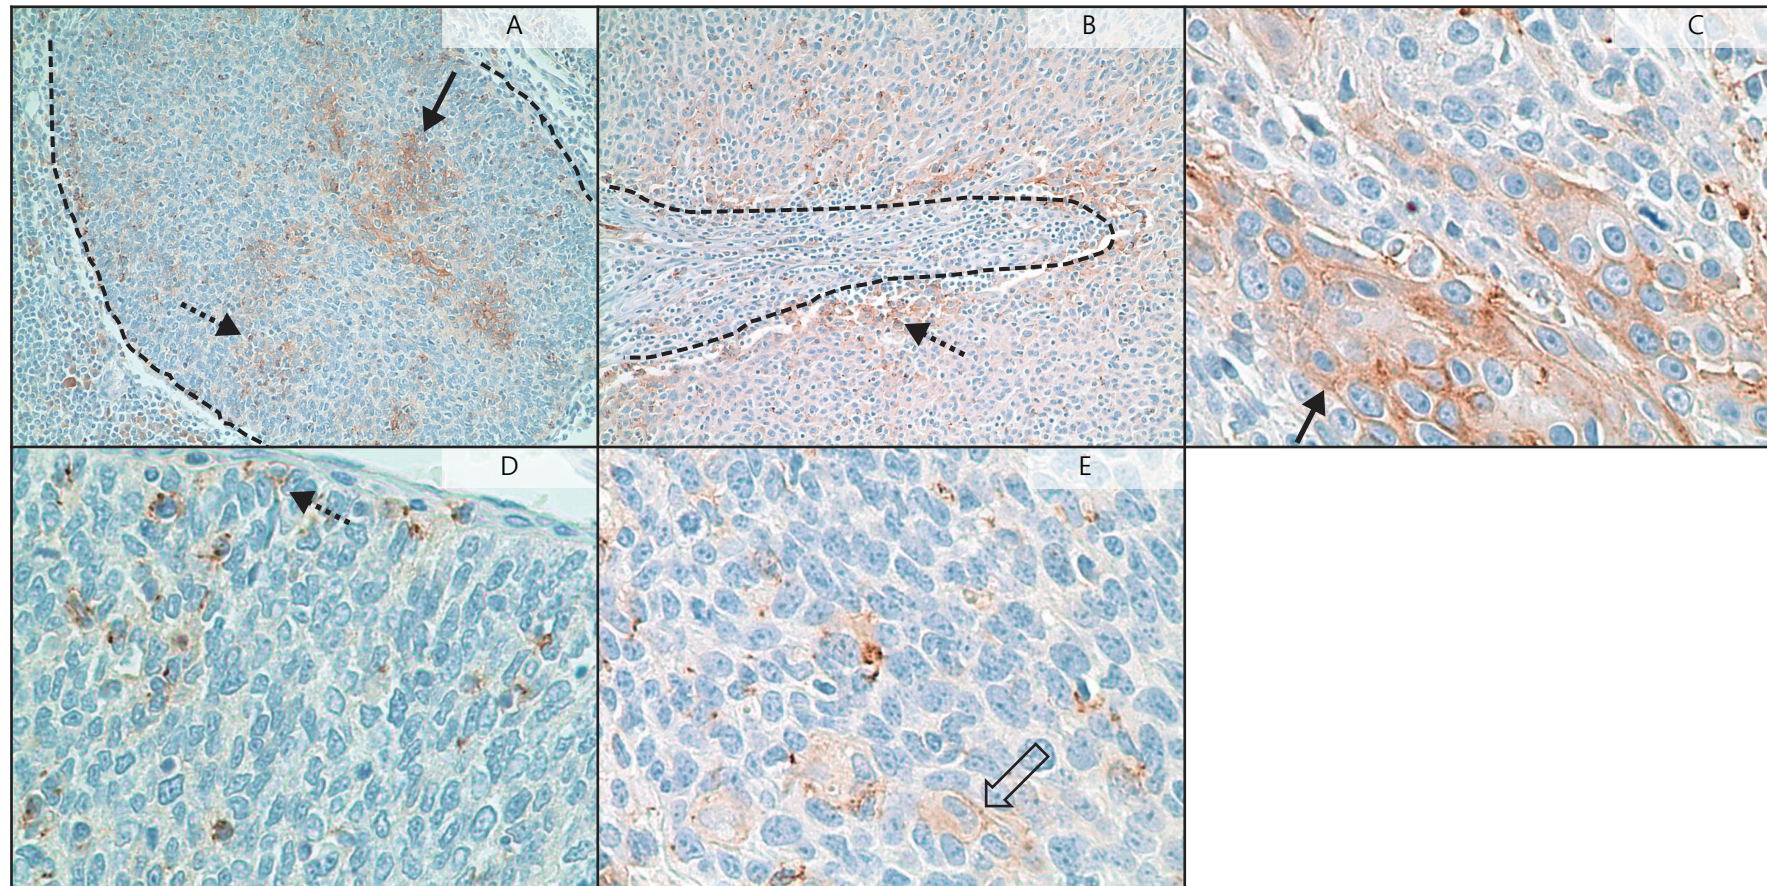

Supplementary Figure 4.

Tumor infiltrating T cells (A, B, and C: empty arrow) are noted as non-cohesive scattered small cells having round dense nuclei and clear cytoplasm, and these histologic features of T cells are discernable from the cancer cells which show larger coarse nuclei, granular cytoplasm, and cohesive growth (B and C). When the cytoplasm of tumor infiltrating CD3+ T cells were negative for PD-L1 in within the tumor cells showing diffuse strong PD-L1 expression (B), these contrasted expression pattern of PD-L1 was easily discernible because of the histologic characteristics of each cell type.

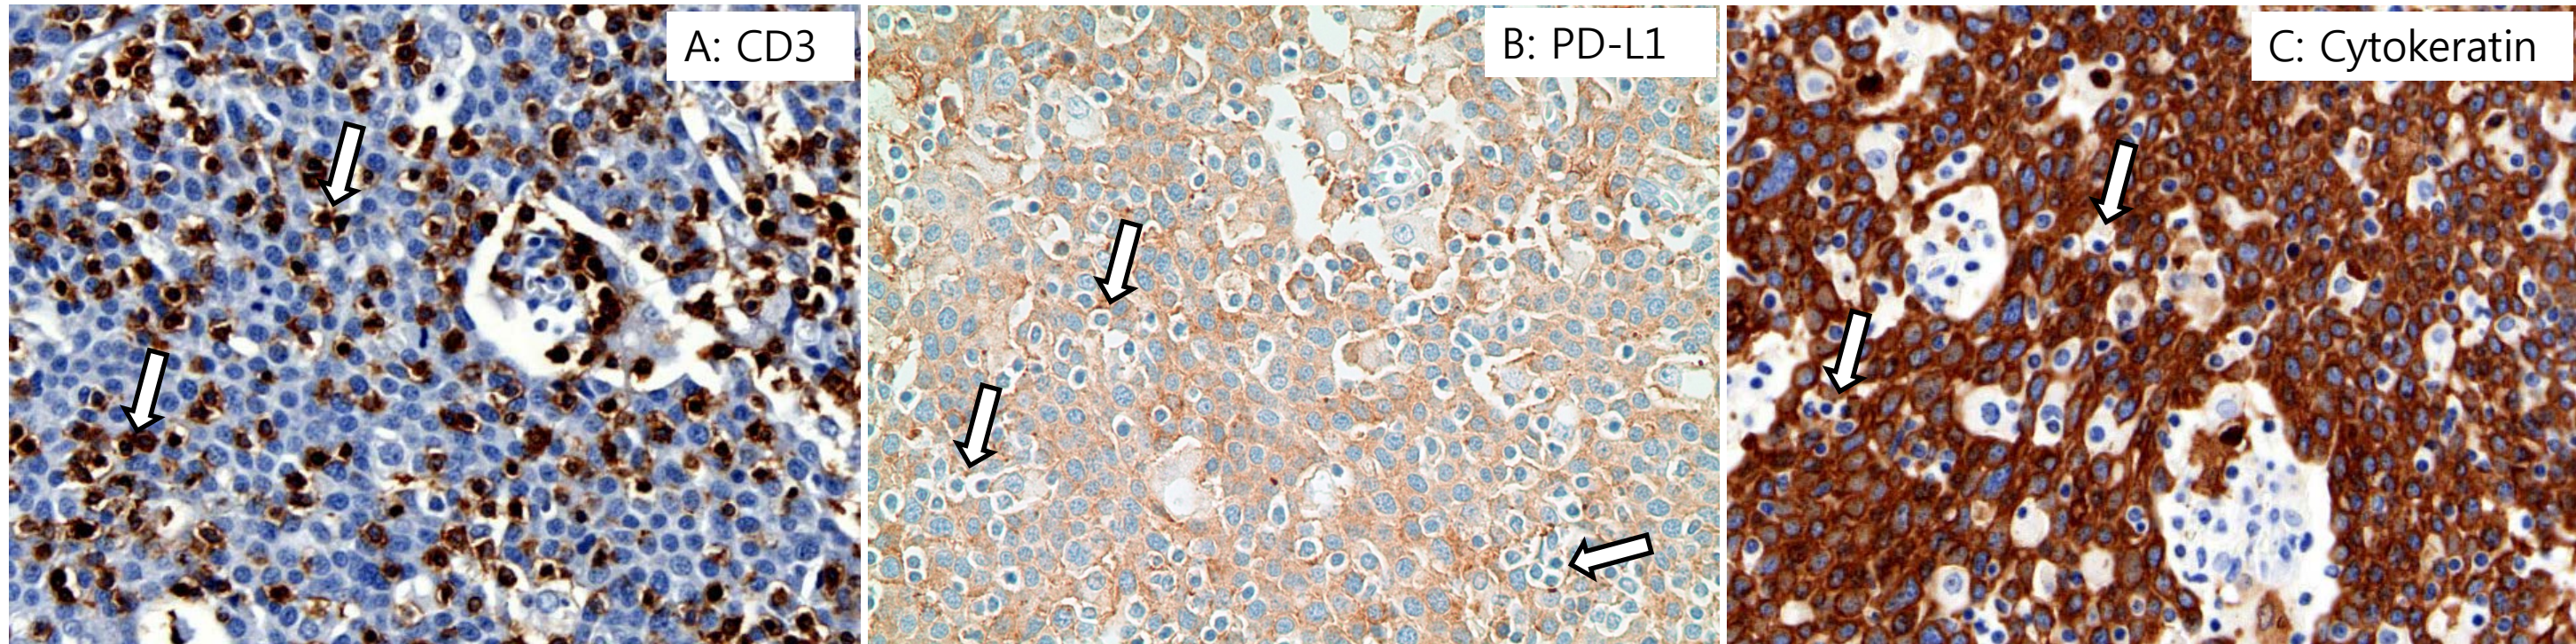



Supplementary Figure 5.

IC3 tumors are characterized by high expression of the T<sub>eff</sub> signature, which was defined by the expression of CD8A, GZMA, GZMB, IFN  $\gamma$ , EOMES, PRF1, CXCL9, and TBX21. P values are presented for TC3 tumors vs. IC3 tumors. STD, standardized; T<sub>eff</sub>, effector T cell; FC, fold change.

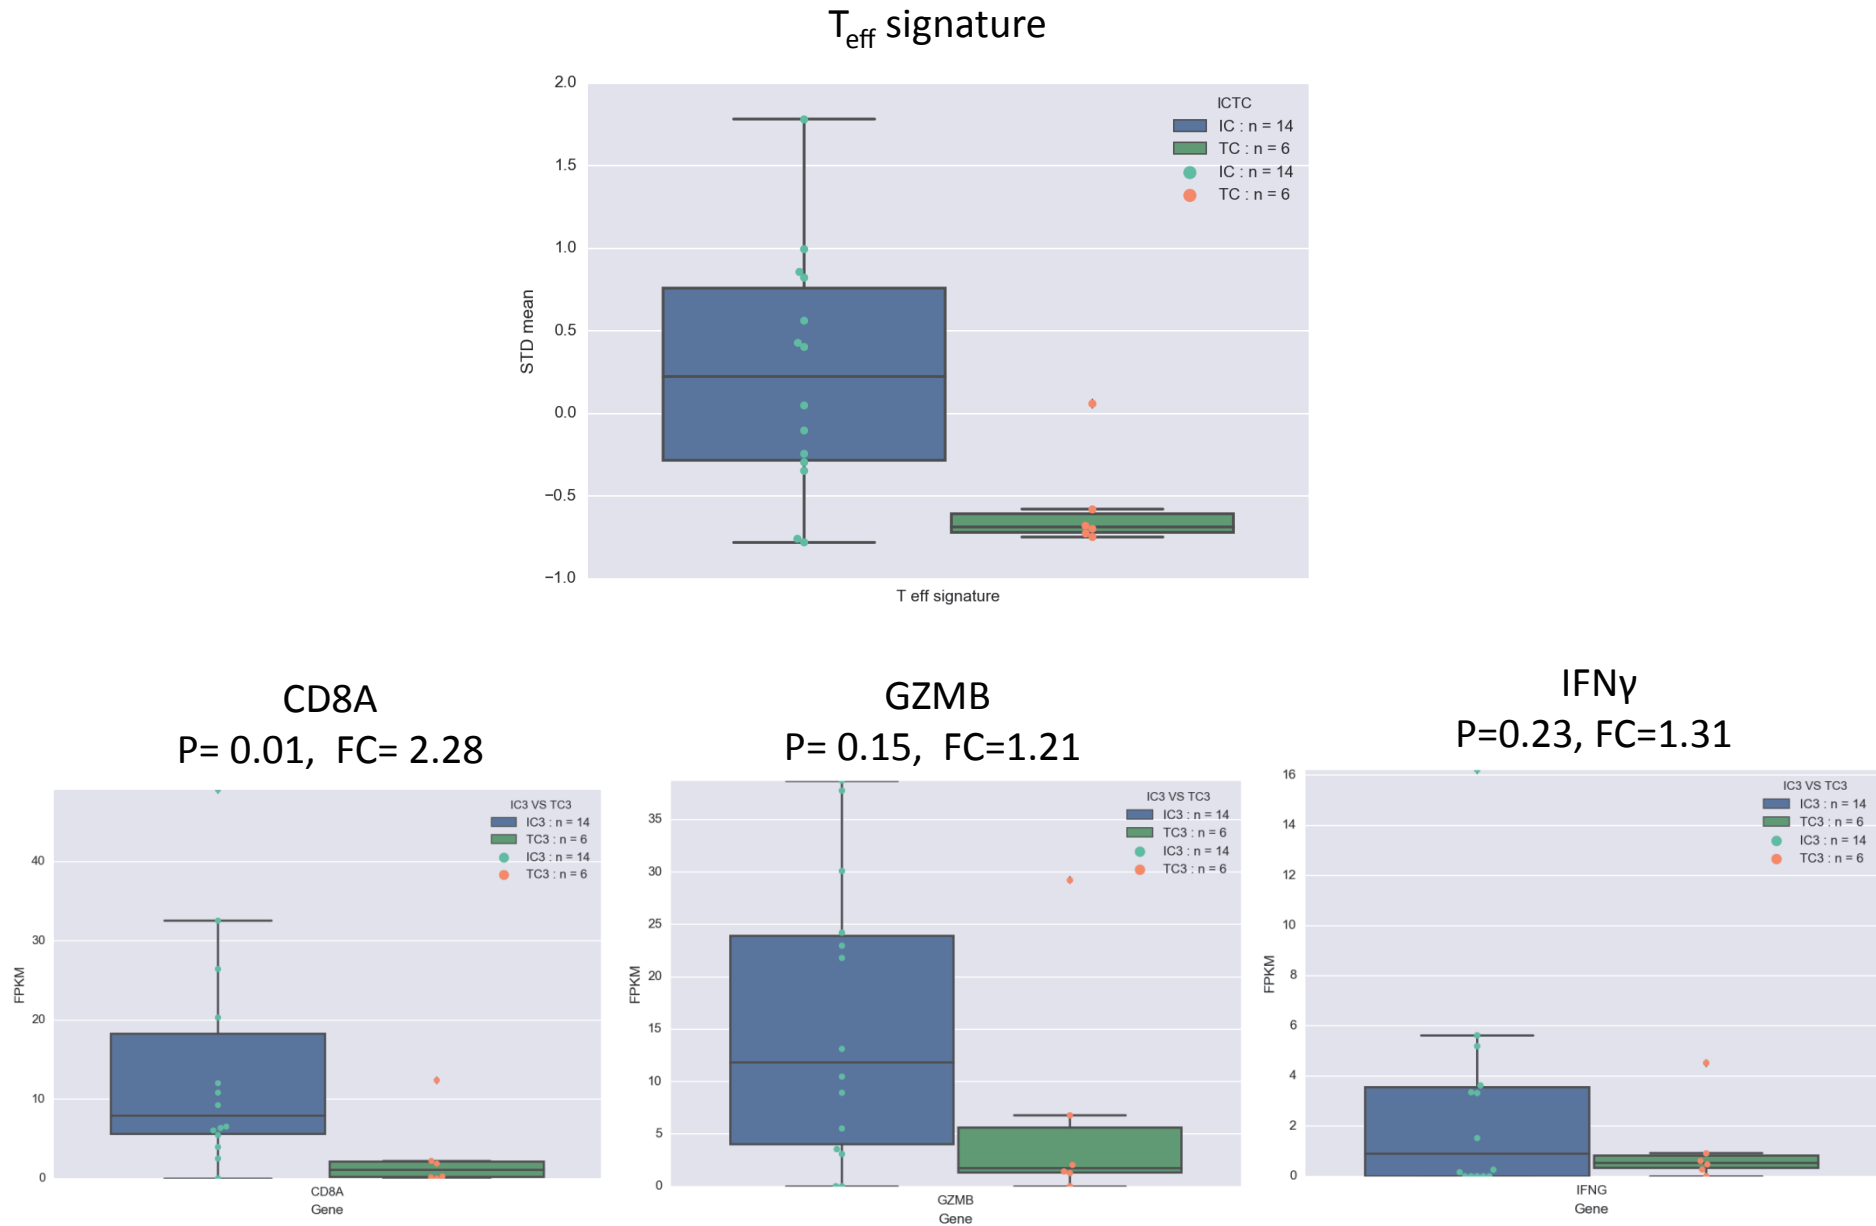

Supplement: srep36956-s1.pdf [file srep36956-s1.pdf]
